# Supplementary material
Source: Springer Nature journal article supplement (https://www.springermedizin.de/resource/supplementary/12881_2007_272_MOESM2_ESM.pdf/9452776)

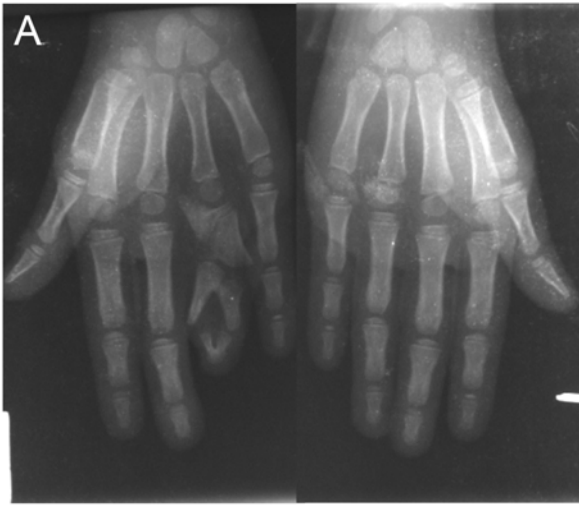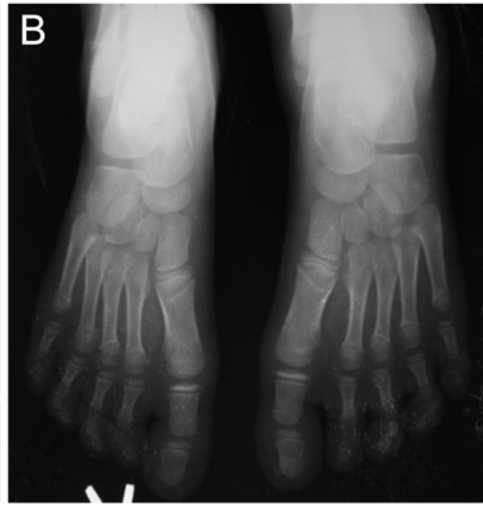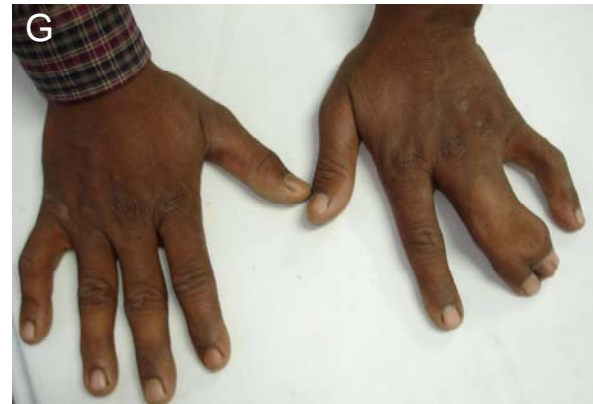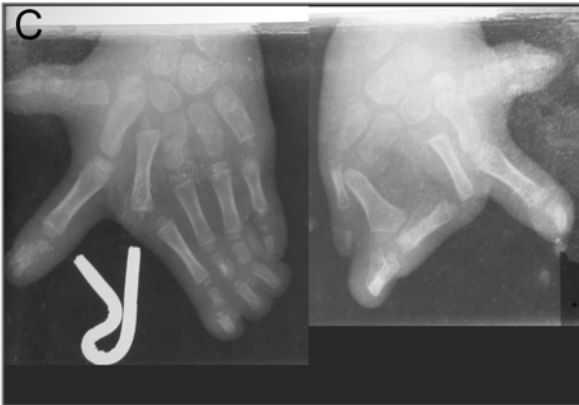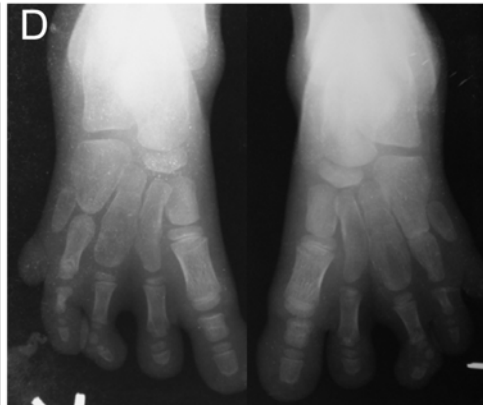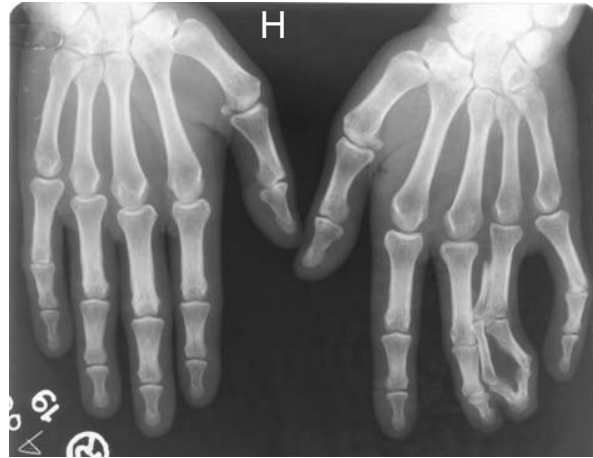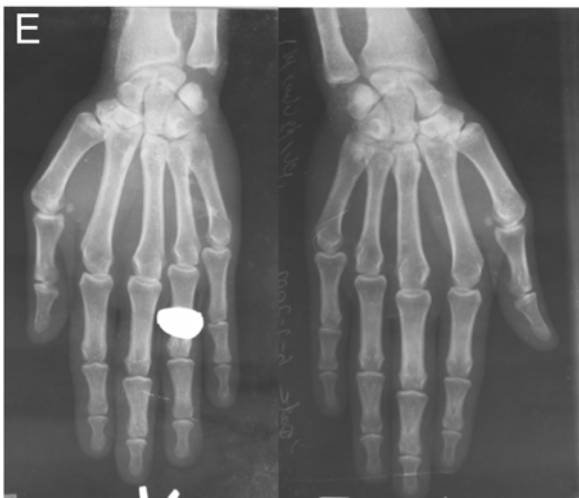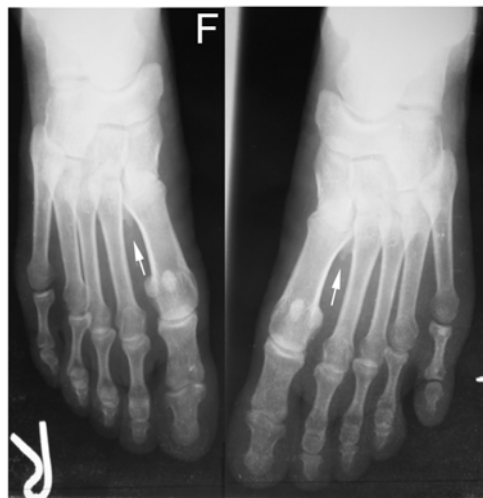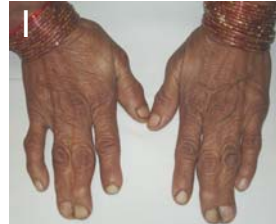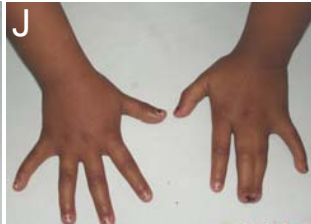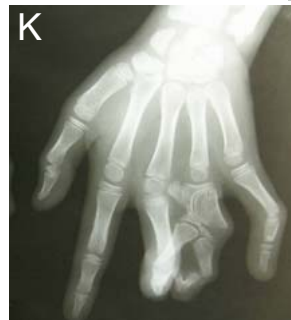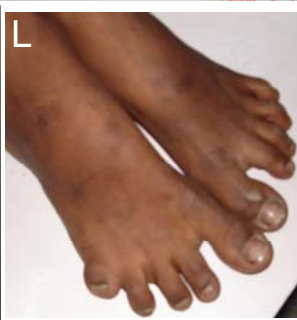

Supplement: MOESM2 [file 9452776]
